# Supplementary material
Source: PubMed Central journal article supplement (PMC2888153)
Supplement: supp_91_5_1284__1.pdf [file supp_91_5_1284__1.pdf]

**Supplementary Table S1.** Comparison of avian- and human-like amino acids in viral proteins of influenza A viruses

| Protein | Amino acid* |            |                                                                                        | References†                                                                            |
|---------|-------------|------------|----------------------------------------------------------------------------------------|----------------------------------------------------------------------------------------|
|         | Position    | Avian-like | Human-like                                                                             |                                                                                        |
| PB2     | 9*          | D          | N                                                                                      |                                                                                        |
|         | 44          | A          | S                                                                                      | Chen <i>et al.</i> (2006); Finkelstein <i>et al.</i> (2007); Shaw <i>et al.</i> (2002) |
|         | 64          | M          | T                                                                                      | Finkelstein <i>et al.</i> (2007)                                                       |
|         | 81          | T          | M                                                                                      | Shaw <i>et al.</i> (2002)                                                              |
|         | 199*        | A          | S                                                                                      | Chen <i>et al.</i> (2006); Finkelstein <i>et al.</i> (2007); Shaw <i>et al.</i> (2002) |
|         | 271         | T          | A                                                                                      | Chen <i>et al.</i> (2006); Finkelstein <i>et al.</i> (2007); Shaw <i>et al.</i> (2002) |
|         | 368*        | R          | K                                                                                      |                                                                                        |
|         | 475         | L          | M                                                                                      | Chen <i>et al.</i> (2006); Finkelstein <i>et al.</i> (2007)                            |
|         | 567         | D          | N                                                                                      | Finkelstein <i>et al.</i> (2007)                                                       |
|         | 588         | A          | I                                                                                      | Chen <i>et al.</i> (2006); Finkelstein <i>et al.</i> (2007); Shaw <i>et al.</i> (2002) |
|         | 613         | V          | T                                                                                      | Chen <i>et al.</i> (2006); Shaw <i>et al.</i> (2002)                                   |
|         | 627*        | E          | K                                                                                      | Chen <i>et al.</i> (2006); Finkelstein <i>et al.</i> (2007)                            |
|         | 661         | A          | T                                                                                      | Shaw <i>et al.</i> (2002)                                                              |
|         | 674         | A          | T                                                                                      | Chen <i>et al.</i> (2006); Finkelstein <i>et al.</i> (2007); Shaw <i>et al.</i> (2002) |
|         | 702         | K          | R                                                                                      | Finkelstein <i>et al.</i> (2007); Shaw <i>et al.</i> (2002)                            |
| PB1     | 327         | R          | K                                                                                      | Chen <i>et al.</i> (2006)                                                              |
|         | 336         | V          | I                                                                                      | Chen <i>et al.</i> (2006)                                                              |
| PB1-F2  | 73          | K          | R                                                                                      | Chen <i>et al.</i> (2006)                                                              |
|         | 76          | V          | A                                                                                      | Chen <i>et al.</i> (2006)                                                              |
|         | 79          | R          | Q                                                                                      | Chen <i>et al.</i> (2006)                                                              |
|         | 82          | L          | S                                                                                      | Chen <i>et al.</i> (2006)                                                              |
|         | 87          | E          | G                                                                                      | Chen <i>et al.</i> (2006)                                                              |
| PA      | 28          | P          | L                                                                                      | Chen <i>et al.</i> (2006); Finkelstein <i>et al.</i> (2007); Shaw <i>et al.</i> (2002) |
|         | 55          | D          | N                                                                                      | Chen <i>et al.</i> (2006); Finkelstein <i>et al.</i> (2007); Shaw <i>et al.</i> (2002) |
|         | 57          | R          | Q                                                                                      | Chen <i>et al.</i> (2006); Finkelstein <i>et al.</i> (2007)                            |
|         | 65          | S          | L                                                                                      | Shaw <i>et al.</i> (2002)                                                              |
|         | 100         | V          | A                                                                                      | Finkelstein <i>et al.</i> (2007); Shaw <i>et al.</i> (2002)                            |
|         | 142*        | K          | N, E                                                                                   |                                                                                        |
|         | 225         | S          | C                                                                                      | Chen <i>et al.</i> (2006); Finkelstein <i>et al.</i> (2007)                            |
|         | 241         | C          | Y                                                                                      | Shaw <i>et al.</i> (2002)                                                              |
|         | 268         | L          | I                                                                                      | Chen <i>et al.</i> (2006); Finkelstein <i>et al.</i> (2007)                            |
|         | 312         | K          | R                                                                                      | Shaw <i>et al.</i> (2002)                                                              |
|         | 337         | A          | S                                                                                      | Finkelstein <i>et al.</i> (2007)                                                       |
|         | 356         | K          | R                                                                                      | Chen <i>et al.</i> (2006)                                                              |
|         | 382         | E          | D                                                                                      | Chen <i>et al.</i> (2006); Shaw <i>et al.</i> (2002)                                   |
|         | 400         | Q, T, S    | L                                                                                      | Shaw <i>et al.</i> (2002)                                                              |
|         | 404         | A          | S                                                                                      | Chen <i>et al.</i> (2006); Finkelstein <i>et al.</i> (2007)                            |
|         | 409         | S          | N                                                                                      | Chen <i>et al.</i> (2006); Finkelstein <i>et al.</i> (2007); Shaw <i>et al.</i> (2002) |
|         | 421*        | S          | I                                                                                      |                                                                                        |
| 552     | T           | S          | Chen <i>et al.</i> (2006); Finkelstein <i>et al.</i> (2007); Shaw <i>et al.</i> (2002) |                                                                                        |
| NP      | 16          | G          | D                                                                                      | Chen <i>et al.</i> (2006); Finkelstein <i>et al.</i> (2007)                            |
|         | 31          | R          | K                                                                                      | Shaw <i>et al.</i> (2002)                                                              |
|         | 33*         | V          | I                                                                                      | Chen <i>et al.</i> (2006); Shaw <i>et al.</i> (2002)                                   |
|         | 61          | I          | L                                                                                      | Chen <i>et al.</i> (2006); Finkelstein <i>et al.</i> (2007); Shaw <i>et al.</i> (2002) |

**Kim, J. H., Hatta, M., Watanabe, S., Neumann, G., Watanabe, T. & Kawaoka, Y. (2010).** Role of host-specific amino acids in the pathogenicity of avian H5N1 influenza viruses in mice. *J Gen Virol* **91**, 1284–1289.

| Protein | Amino acid* |            | References† |                                                                                        |
|---------|-------------|------------|-------------|----------------------------------------------------------------------------------------|
|         | Position    | Avian-like |             | Human-like                                                                             |
|         | 100*        | R          | V, I        | Chen <i>et al.</i> (2006); Shaw <i>et al.</i> (2002)                                   |
|         | 109         | I          | V           | Chen <i>et al.</i> (2006)                                                              |
|         | 127         | E          | D           | Shaw <i>et al.</i> (2002)                                                              |
|         | 136         | L          | M           | Shaw <i>et al.</i> (2002)                                                              |
|         | 214         | R          | K           | Chen <i>et al.</i> (2006); Shaw <i>et al.</i> (2002)                                   |
|         | 283*        | L          | P           | Chen <i>et al.</i> (2006); Finkelstein <i>et al.</i> (2007); Shaw <i>et al.</i> (2002) |
|         | 293         | R          | K           | Chen <i>et al.</i> (2006); Shaw <i>et al.</i> (2002)                                   |
|         | 305         | R          | K           | Chen <i>et al.</i> (2006); Finkelstein <i>et al.</i> (2007)                            |
|         | 313         | F          | Y           | Chen <i>et al.</i> (2006); Finkelstein <i>et al.</i> (2007); Shaw <i>et al.</i> (2002) |
|         | 357*        | Q          | K           | Chen <i>et al.</i> (2006); Finkelstein <i>et al.</i> (2007)                            |
|         | 372         | E          | D           | Chen <i>et al.</i> (2006)                                                              |
|         | 375         | D          | G, E        | Shaw <i>et al.</i> (2002)                                                              |
|         | 422         | R          | K           | Chen <i>et al.</i> (2006)                                                              |
|         | 442         | T          | A           | Chen <i>et al.</i> (2006)                                                              |
|         | 455         | D          | E           | Chen <i>et al.</i> (2006)                                                              |
| M1      | 115         | V          | I           | Chen <i>et al.</i> (2006); Finkelstein <i>et al.</i> (2007)                            |
|         | 121         | T          | A           | Chen <i>et al.</i> (2006); Finkelstein <i>et al.</i> (2007)                            |
|         | 137         | T          | A           | Chen <i>et al.</i> (2006); Finkelstein <i>et al.</i> (2007); Shaw <i>et al.</i> (2002) |
| M2      | 11          | T          | I           | Chen <i>et al.</i> (2006)                                                              |
|         | 16          | E          | G           | Shaw <i>et al.</i> (2002)                                                              |
|         | 20          | S          | N           | Chen <i>et al.</i> (2006); Shaw <i>et al.</i> (2002)                                   |
|         | 28          | I          | I, V        | Shaw <i>et al.</i> (2002)                                                              |
|         | 55          | L          | F           | Shaw <i>et al.</i> (2002)                                                              |
|         | 57          | Y          | H           | Chen <i>et al.</i> (2006)                                                              |
|         | 78          | Q          | K           | Shaw <i>et al.</i> (2002)                                                              |
|         | 86          | V          | A           | Chen <i>et al.</i> (2006)                                                              |
| NS1     | 81          | I          | M           | Finkelstein <i>et al.</i> (2007)                                                       |
|         | 215         | P          | T           | Finkelstein <i>et al.</i> (2007)                                                       |
|         | 227         | E          | R           | Chen <i>et al.</i> (2006); Finkelstein <i>et al.</i> (2007)                            |
| NS2     | 70          | S          | G           | Chen <i>et al.</i> (2006)                                                              |
|         | 107         | L          | F           | Chen <i>et al.</i> (2006)                                                              |

\*We analysed protein sequences in the Influenza Sequence Database and identified 75 host-specific amino acids conserved in human and avian influenza viruses. Human-like amino acids at positions flagged with an asterisk were tested for their contributions to avian virus replication in a mouse model.

†Host-specific amino acids identified in this study that have also been described in papers published by others.

## References

- Chen, G. W., Chang, S. C., Mok, C. K., Lo, Y. L., Kung, Y. N., Huang, J. H., Shih, Y. H., Wang, J. Y., Chiang, C. & other authors (2006). Genomic signatures of human versus avian influenza A viruses. *Emerg Infect Dis* **12**, 1353–1360. [Medline](#)
- Finkelstein, D. B., Mukatira, S., Mehta, P. K., Obenauer, J. C., Su, X., Webster, R. G. & Naeve, C. W. (2007). Persistent host markers in pandemic and H5N1 influenza viruses. *J Virol* **81**, 10292–10299. [Medline](#)
- Shaw, M., Cooper, L., Xu, X., Thompson, W., Krauss, S., Guan, Y., Zhou, N., Klimov, A., Cox, N. & other authors (2002). Molecular changes associated with the transmission of avian influenza A H5N1 and H9N2 viruses to humans. *J Med Virol* **66**, 107–114. [Medline](#)

---

Kim, J. H., Hatta, M., Watanabe, S., Neumann, G., Watanabe, T. & Kawaoka, Y. (2010). Role of host-specific amino acids in the pathogenicity of avian H5N1 influenza viruses in mice. *J Gen Virol* **91**, 1284–1289.
